# Supplementary material
Source: PubMed Central journal article supplement (PMC3313829)

Accession: MLEID  
Length: 10,326 bp

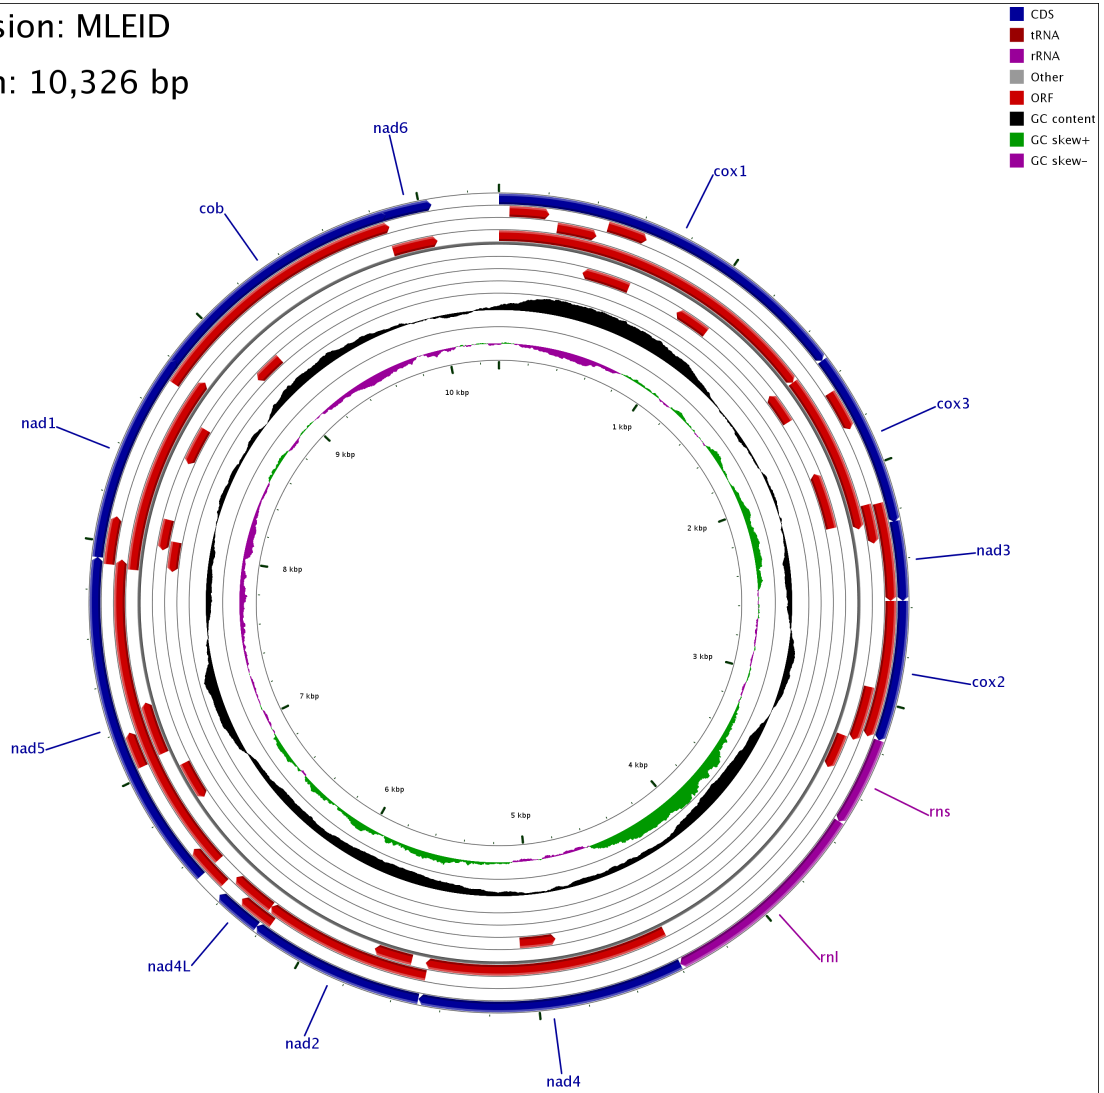

*Mnemiopsis leidyi* mtDNA

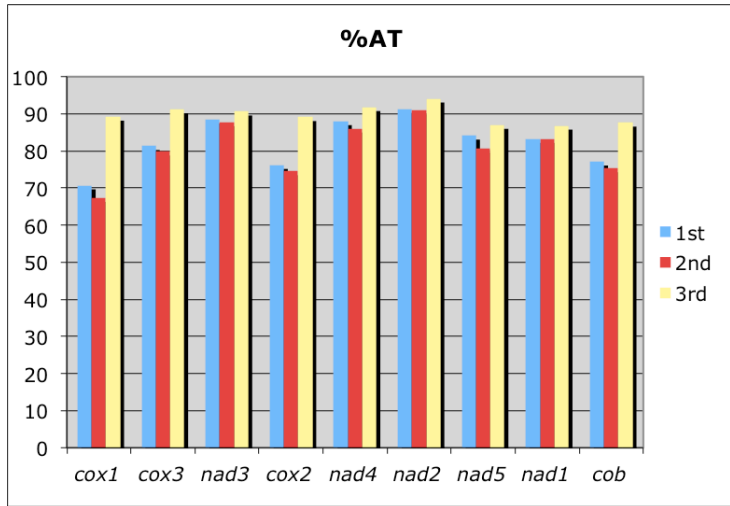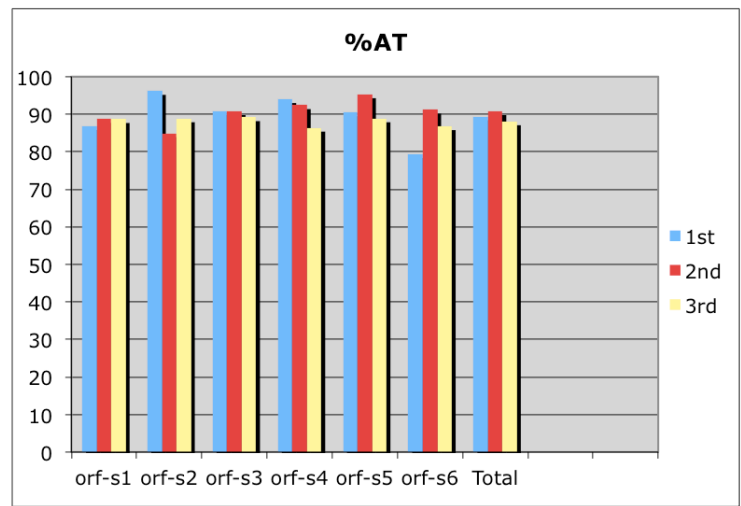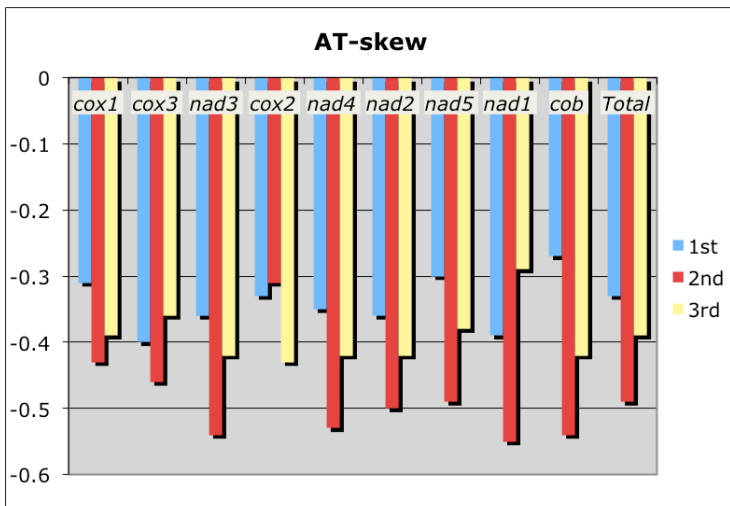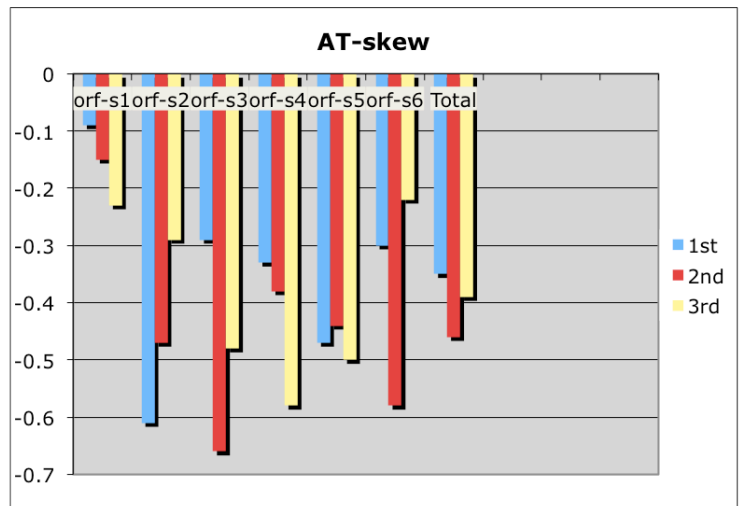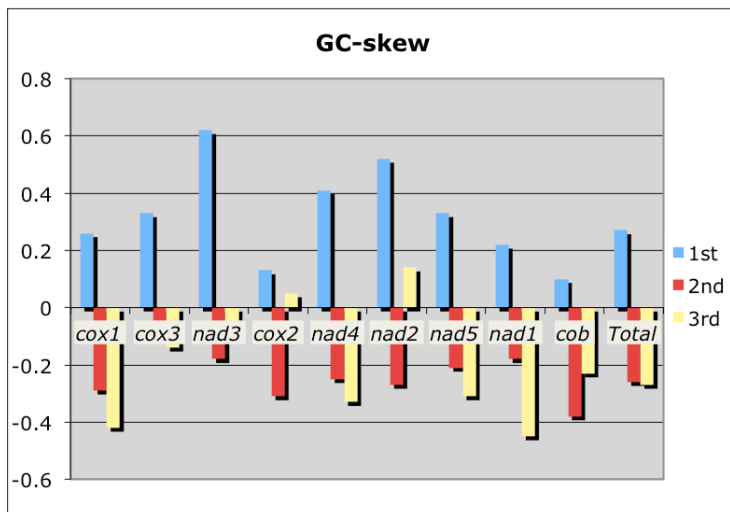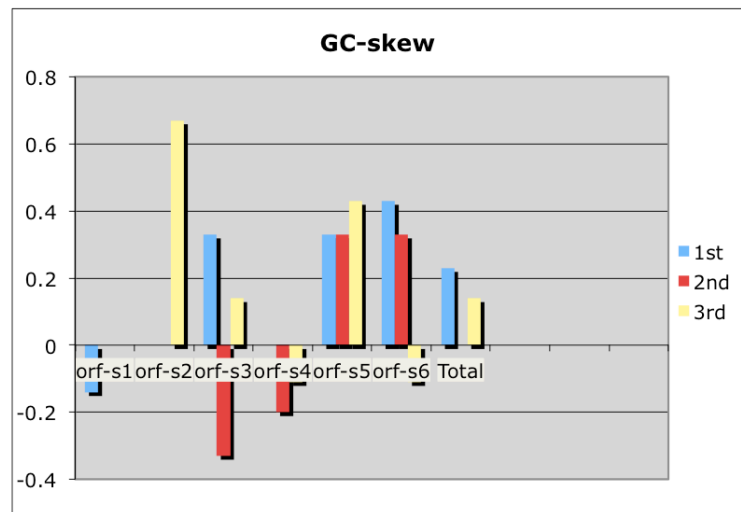

Figure S2. Nucleotide composition of coding sequences and small ORFs in *M. leidyi* mtDNA

**Figure S3. Predicted transmembrane helices in *Mnemiopsis leidyi* (left) and *Sarcophyton glaucum* (right).** Expected numbers of helices for each protein are shown in parentheses.

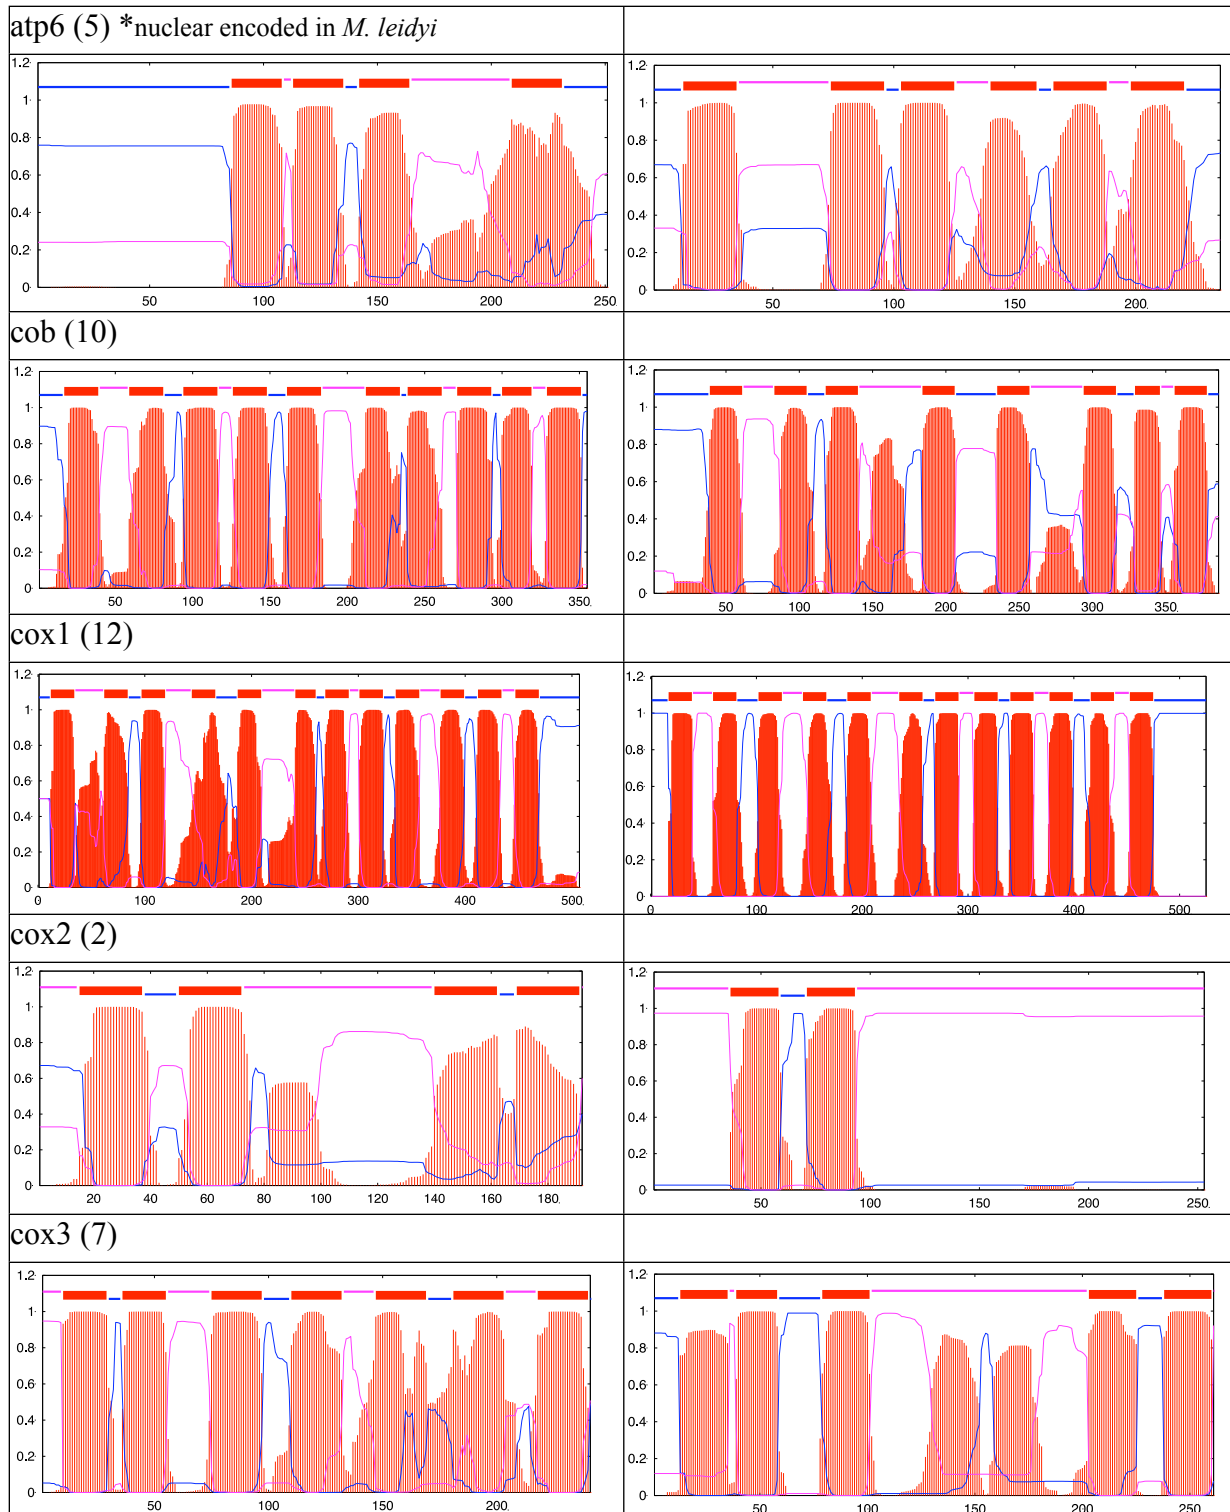

nad1 (expect 8)

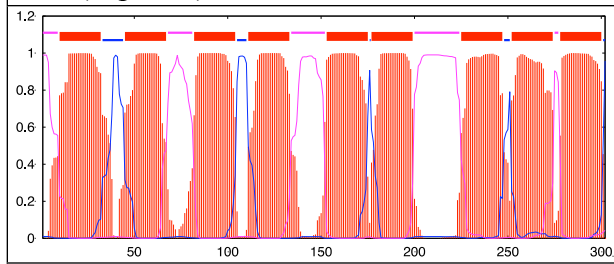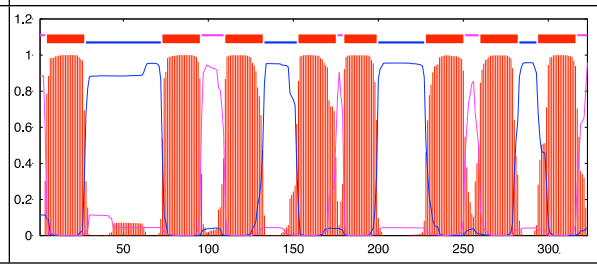

nad2 (expect 14) orf1

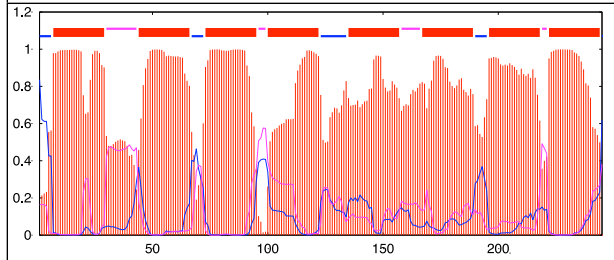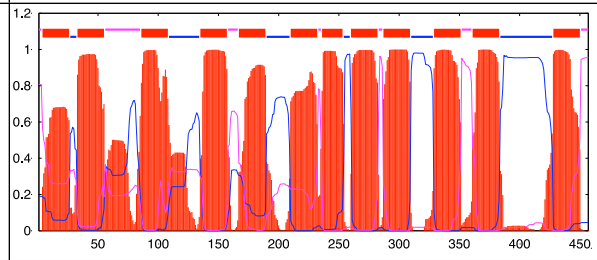

nad3 (3)

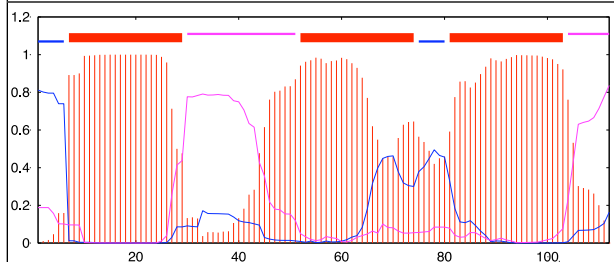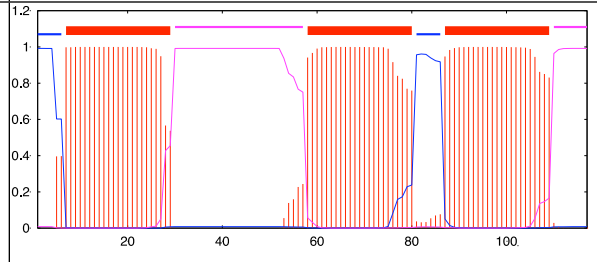

nad4 (some problems)

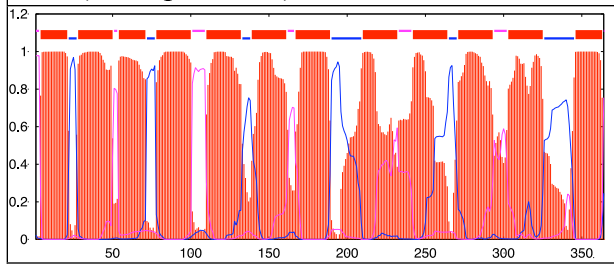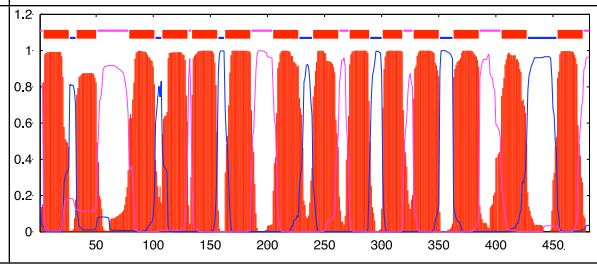

nad4L (3)

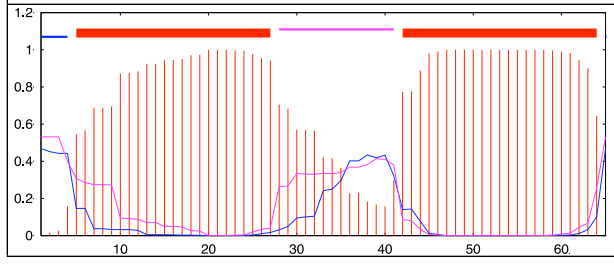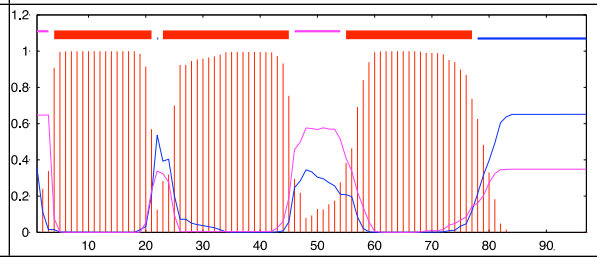

nad5 (14+)

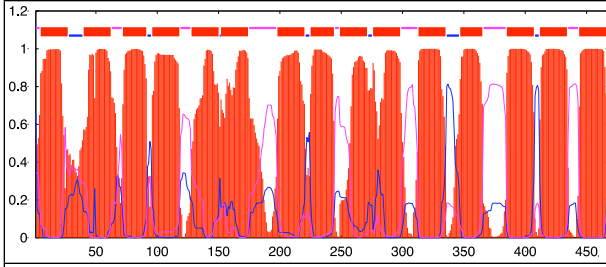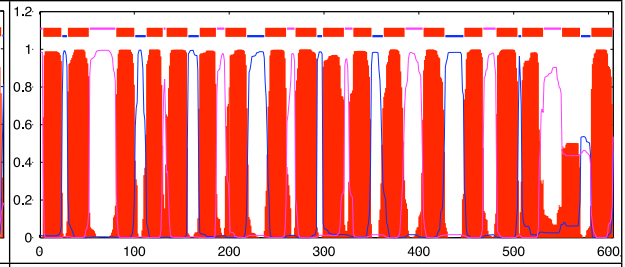

nad6 (5)

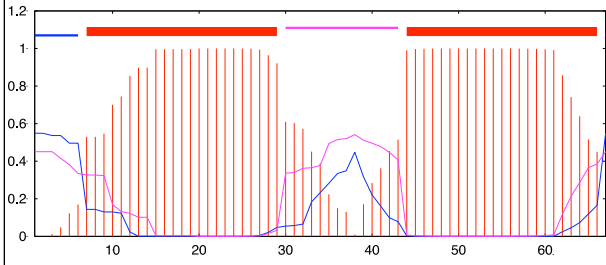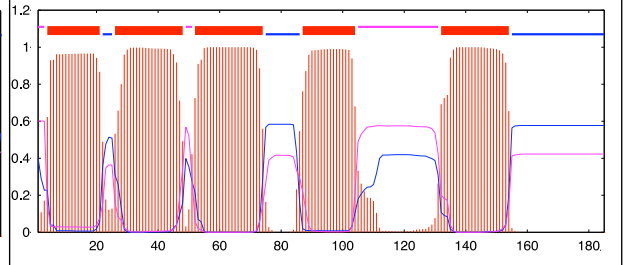

Supplement: NIHMS363370-supplement-S1-S3.pdf [file NIHMS363370-supplement-S1-S3.pdf]
